# Supplementary material for: Double design of host and guest synergistically reinforces the Na-ion storage of sulfur cathodes
Source: Royal Society of Chemistry journal article supplement (doi:10.1039/d2sc06831a), 2023-01-01
Supplement: d2sc06831a1.pdf [file d2sc06831a1.pdf]

## Supporting Information

### Double Design of Host and Guest Synergistically Reinforces Na-ion Storage of Sulfur Cathodes

Xiang Long Huang,<sup>1</sup> Hong Zhong,<sup>1</sup> Ce Li,<sup>1</sup> Yaojie Lei,<sup>3</sup> Shaohui Zhang,<sup>4</sup> Yuhan Wu,<sup>5</sup> Wenli Zhang,<sup>6</sup> Hua Kun Liu,<sup>2,3</sup> Shi Xue Dou,<sup>2,3\*</sup> Zhiming M. Wang<sup>1,7\*</sup>

<sup>1</sup> Institute of Fundamental and Frontier Sciences, University of Electronic Science and Technology of China, Chengdu 611137, China

E-mail: [zhmwang@uestc.edu.cn](mailto:zhmwang@uestc.edu.cn)

<sup>2</sup> Institute of Energy Materials Science, University of Shanghai for Science and Technology, Shanghai 200093, China

E-mail: [shi@usst.edu.cn](mailto:shi@usst.edu.cn)

<sup>3</sup> Institute for Superconducting and Electronic Materials, University of Wollongong, NSW 2500, Australia

<sup>4</sup> Guangdong Provincial Key Laboratory of Micro/Nano Optomechatronic Engineering, College of Mechatronics and Control Engineering, Shenzhen University, Shenzhen 518060, China

<sup>5</sup> School of Environmental and Chemical Engineering, Shenyang University of Technology, Shenyang 110870, China

<sup>6</sup> School of Chemical Engineering and Light Industry, Guangdong University of Technology, 100 Waihuan Xi Road, Guangzhou 510006, China

<sup>7</sup> Institute for Advanced Study, Chengdu University, Chengdu 610106, China

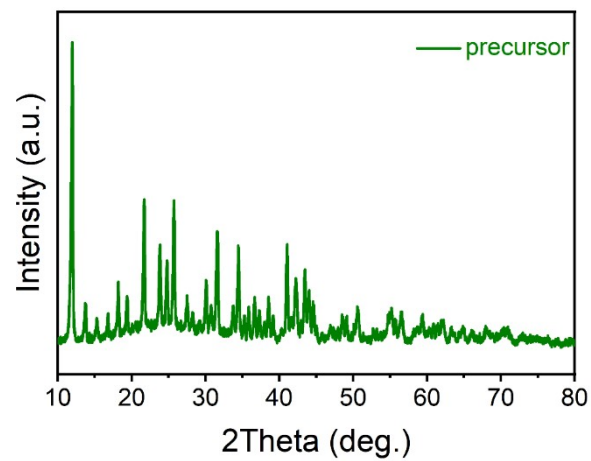

**Figure S1.** XRD pattern of the precursor.

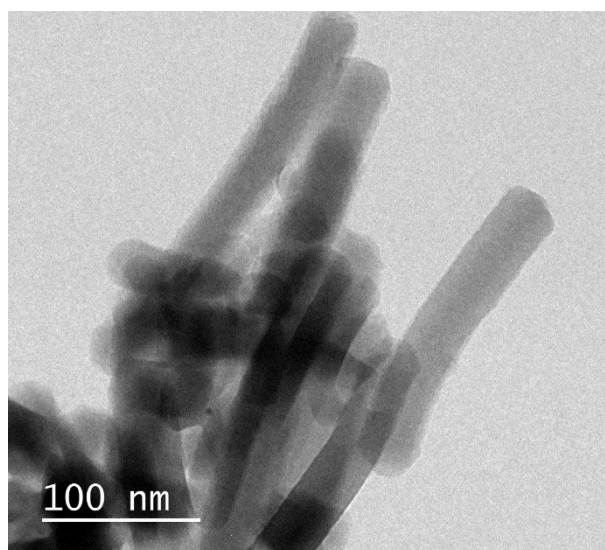

**Figure S2.** TEM image of the precursor.

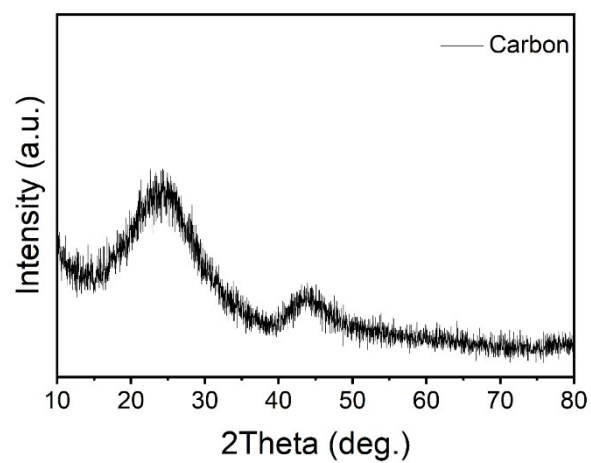

**Figure S3.** XRD pattern of the carbon.

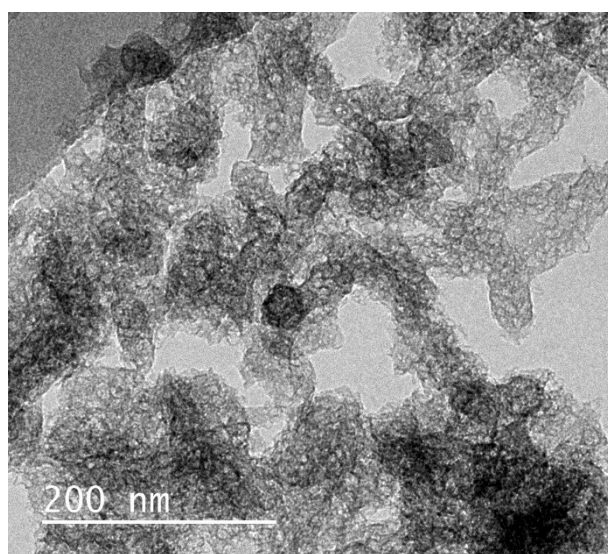

**Figure S4.** TEM image of the porous carbon.

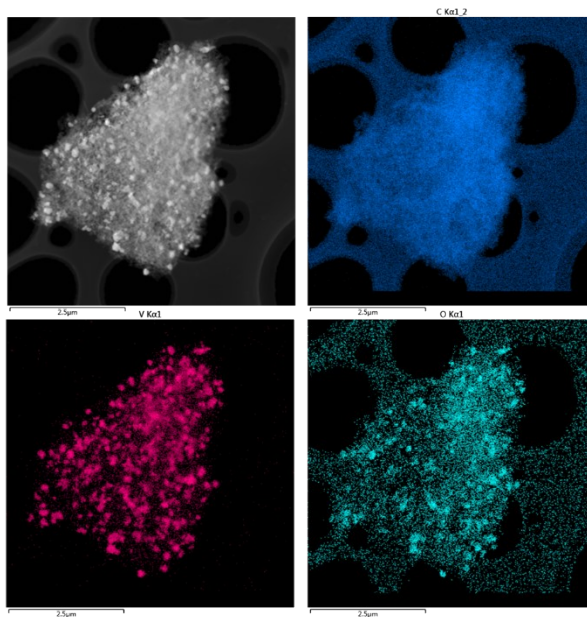

Figure S5. STEM and EDS mappings of the  $V_2O_3@C$

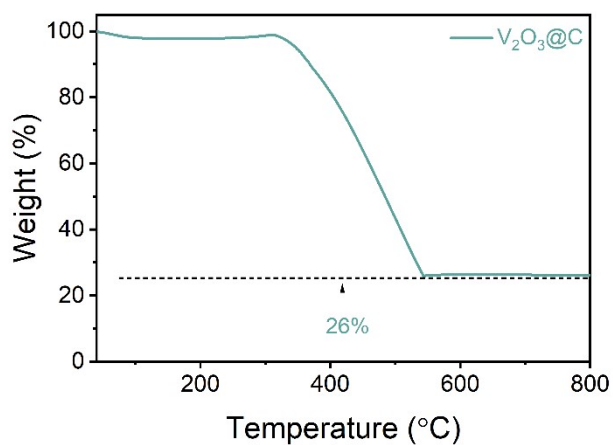

Figure S6. TGA curve of the  $V_2O_3@C$  composite at air atmosphere.

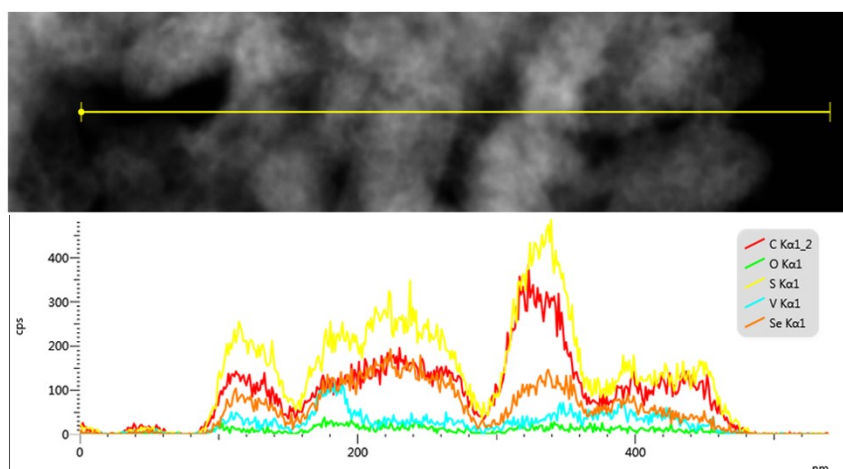

Figure S7. Linear elemental distribution of the  $SeS_2/V_2O_3@C$ .

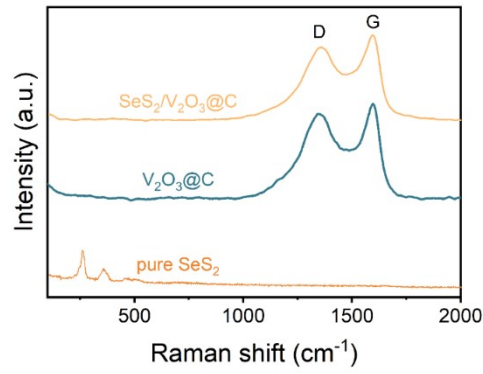

**Figure S8.** Raman spectra of the pure  $\text{SeS}_2$ ,  $\text{V}_2\text{O}_3@C$ , and  $\text{SeS}_2/\text{V}_2\text{O}_3@C$ .

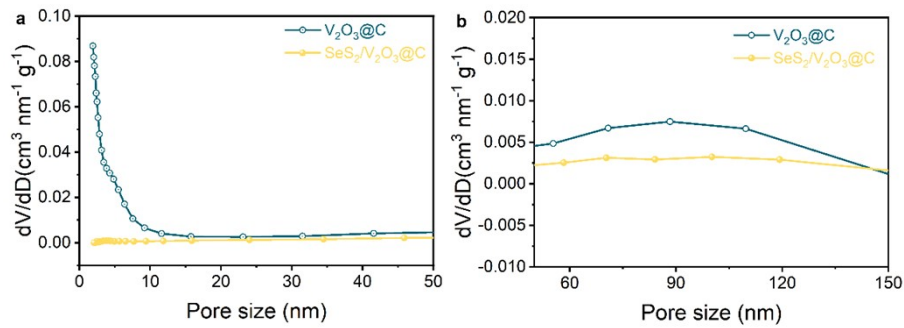

**Figure S9.** Pore size distribution of the  $\text{V}_2\text{O}_3@C$  and  $\text{SeS}_2/\text{V}_2\text{O}_3@C$ .

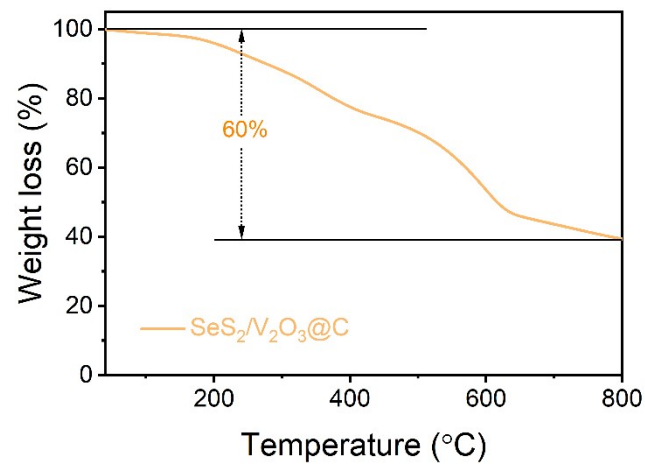

**Figure S10.** TGA curve of the  $\text{SeS}_2/\text{V}_2\text{O}_3@C$  composite.

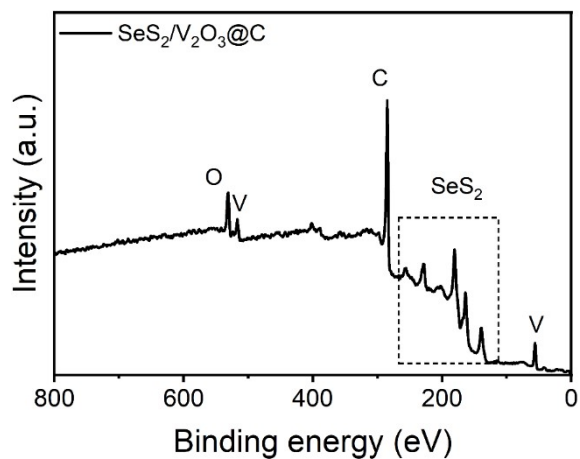

**Figure S11.** Survey XPS spectra of the  $\text{SeS}_2/\text{V}_2\text{O}_3@\text{C}$  composite.

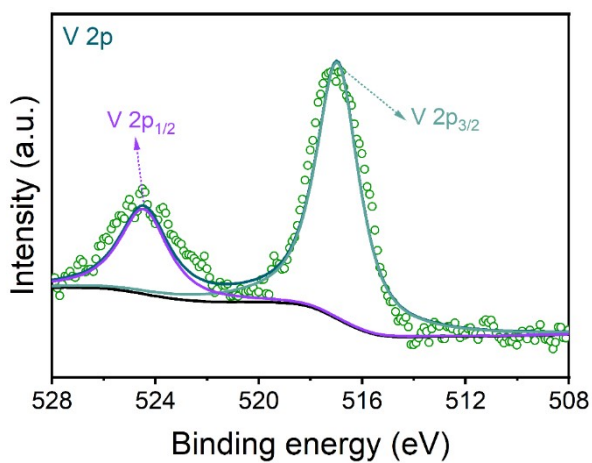

**Figure S12.** XPS spectra of V 2p.

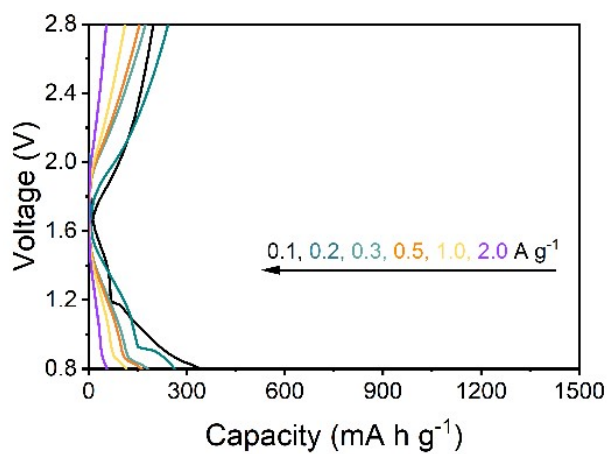

**Figure S13.** Rate profiles of the  $\text{SeS}_2/\text{C}$  composite.

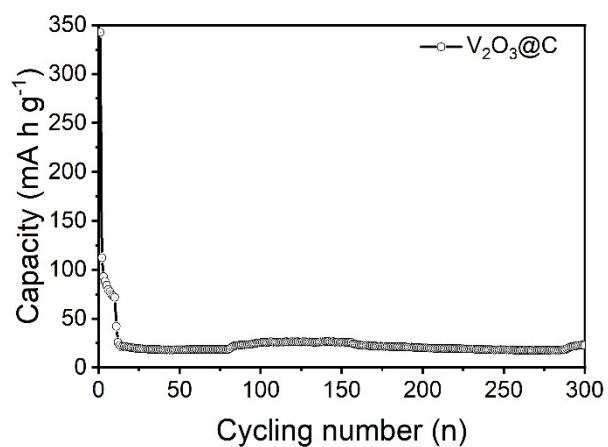

**Figure S14.** Cycling performance of the  $V_2O_3@C$  composite.

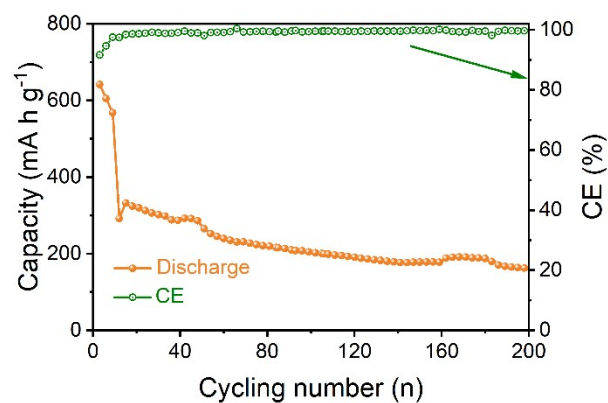

**Figure S15.** Cycling performance of the  $SeS_2/V_2O_3@C$  with a loading content of 70% at  $1.0 A g^{-1}$ .

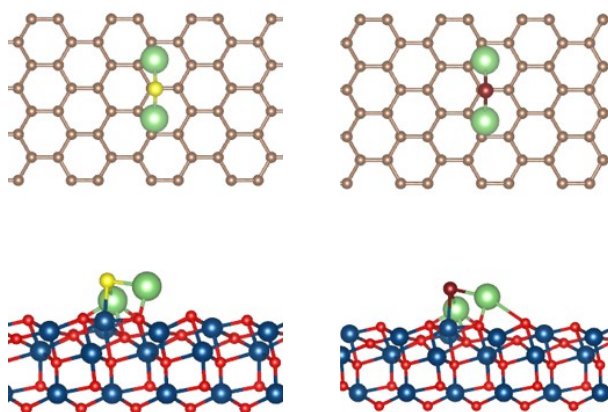

**Figure S16.** Configurations between  $Na_2S/Na_2Se$  and graphene/ $V_2O_3$ .

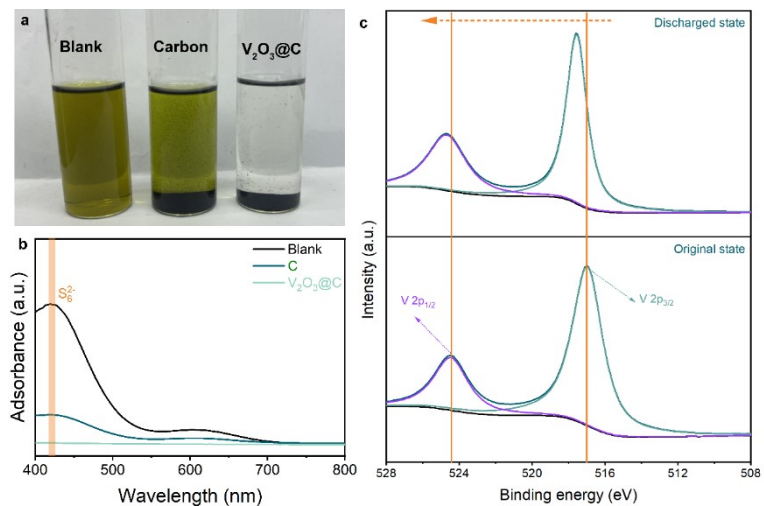

**Figure S17.** (a) Optical photos of the blank solution and solutions with different materials; UV-vis spectrum of the polysulfide solutions soaked with different materials; (c) XPS spectra of V 2p before and after discharging to 2.0 V.

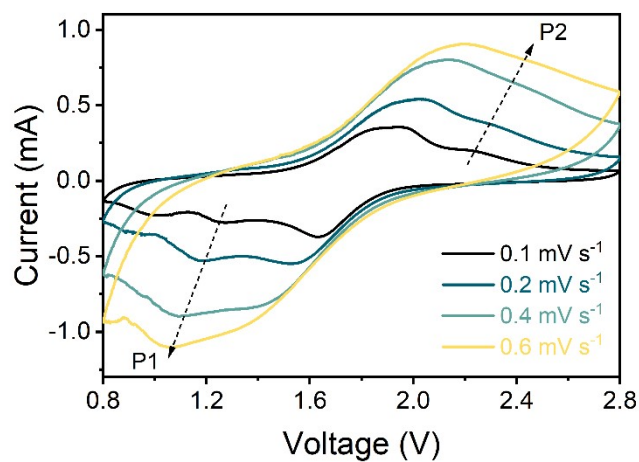

**Figure S18.** CV curves at different scan rates.



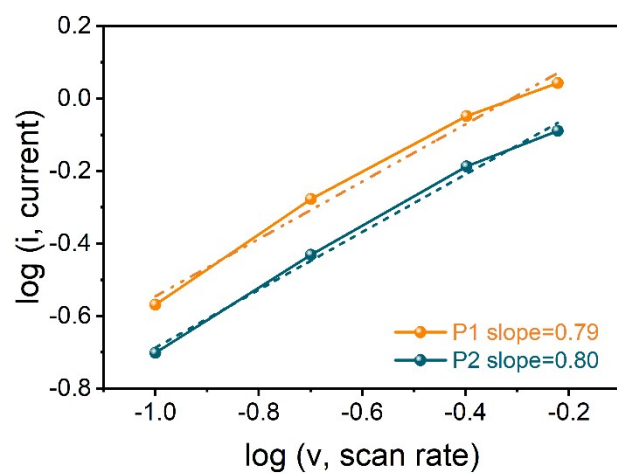

**Figure S19.** Linear fitted b-values obtained from CV curves at various sweep rates.

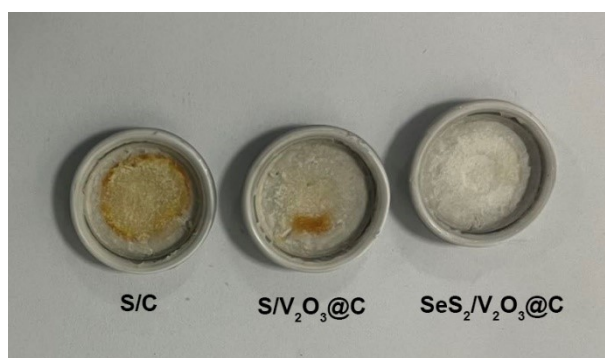

**Figure S20.** Separators from the cycled batteries assembled with different cathode materials.

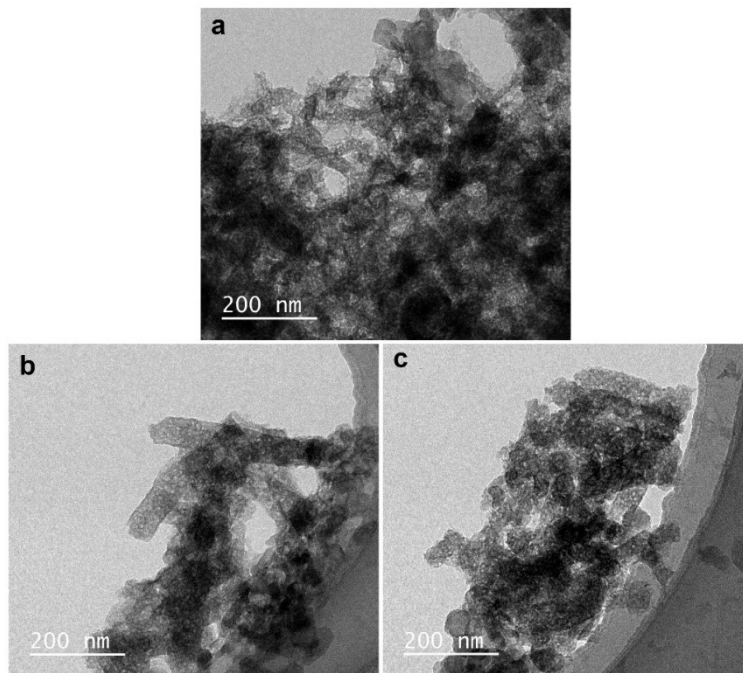

**Figure S21.** TEM images of the  $\text{SeS}_2/\text{V}_2\text{O}_3@\text{C}$  cathode after cycling at different regions.

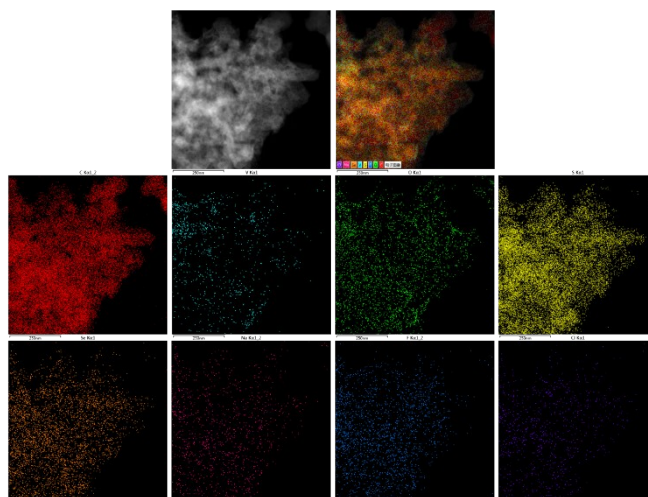

**Figure S22.** STEM image and corresponding EDS mappings of the  $\text{SeS}_2/\text{V}_2\text{O}_3@\text{C}$  cathode after cycling

## References

- [1] A. Abouimrane, D. Dambournet, K.W. Chapman, P.J. Chupas, W. Weng, K. Amine, A new class of lithium and sodium rechargeable batteries based on selenium and selenium-sulfur as a

- positive electrode, *J. Am. Chem. Soc.* 134 (2012) 4505-4508.
- [2] Y. Yao, L. Zeng, S. Hu, Y. Jiang, B. Yuan, Y. Yu, Binding  $S_{0.6}Se_{0.4}$  in 1D Carbon Nanofiber with C-S Bonding for High-Performance Flexible Li-S Batteries and Na-S Batteries, *Small* 13 (2017) 1603513.
- [3] Z. Li, J. Zhang, Y. Lu, W. Lou Xiong, A pyrolyzed polyacrylonitrile/selenium disulfide composite cathode with remarkable lithium and sodium storage performances, *Sci. Adv.* 4 (2018) eaat1687.
- [4] L. Zeng, Y. Yao, J. Shi, Y. Jiang, W. Li, L. Gu, Y. Yu, A flexible  $S_{1-x}Se_x$ @porous carbon nanofibers ( $x \leq 0.1$ ) thin film with high performance for Li-S batteries and room-temperature Na-S batteries, *Energy Storage Mater.* 5 (2016) 50-57.
- [5] T. Yang, Y. Qi, W. Zhong, M. Tao, B. Guo, Y. Wu, S.J. Bao, M. Xu, A Strategy for Polysulfides/Polyselenides Protection Based on  $Co_9S_8@SiO_2/C$  Host in Na- $SeS_2$  Batteries, *Adv. Funct. Mater.* 31 (2020) 2001952.
- [6] J. Ma, L. Gao, S. Li, Z. Zeng, L. Zhang, J. Xie, Dual Play of Chitin-Derived N-Doped Carbon Nanosheets Enabling High-Performance Na- $SeS_2$  Half/Full Cells, *Batteries Supercaps* 3 (2020) 165-173.
- [7] Y. Deng, L. Gong, H. Ahmed, Y. Pan, X. Cheng, S. Zhu, H. Zhang, N-doped interconnected carbon aerogels as an efficient  $SeS_2$  host for long life Na- $SeS_2$  batteries, *Nano Res.* 13 (2020) 967-974.
- [8] V.H. Pham, J.A. Boscoboinik, D.J. Stacchiola, E.C. Self, P. Manikandan, S. Nagarajan, Y. Wang, V.G. Pol, J. Nanda, E. Paek, D. Mitlin, Selenium-sulfur (SeS) fast charging cathode for sodium and lithium metal batteries, *Energy Storage Mater.* 20 (2019) 71-79.
